# Supplementary figures and images for: Analyses of Early ZIKV Genomes Are Consistent with Viral Spread from Northeast Brazil to the Americas
Source: MDPI journal article supplement (doi:10.3390/v15061236), 2023-05-25

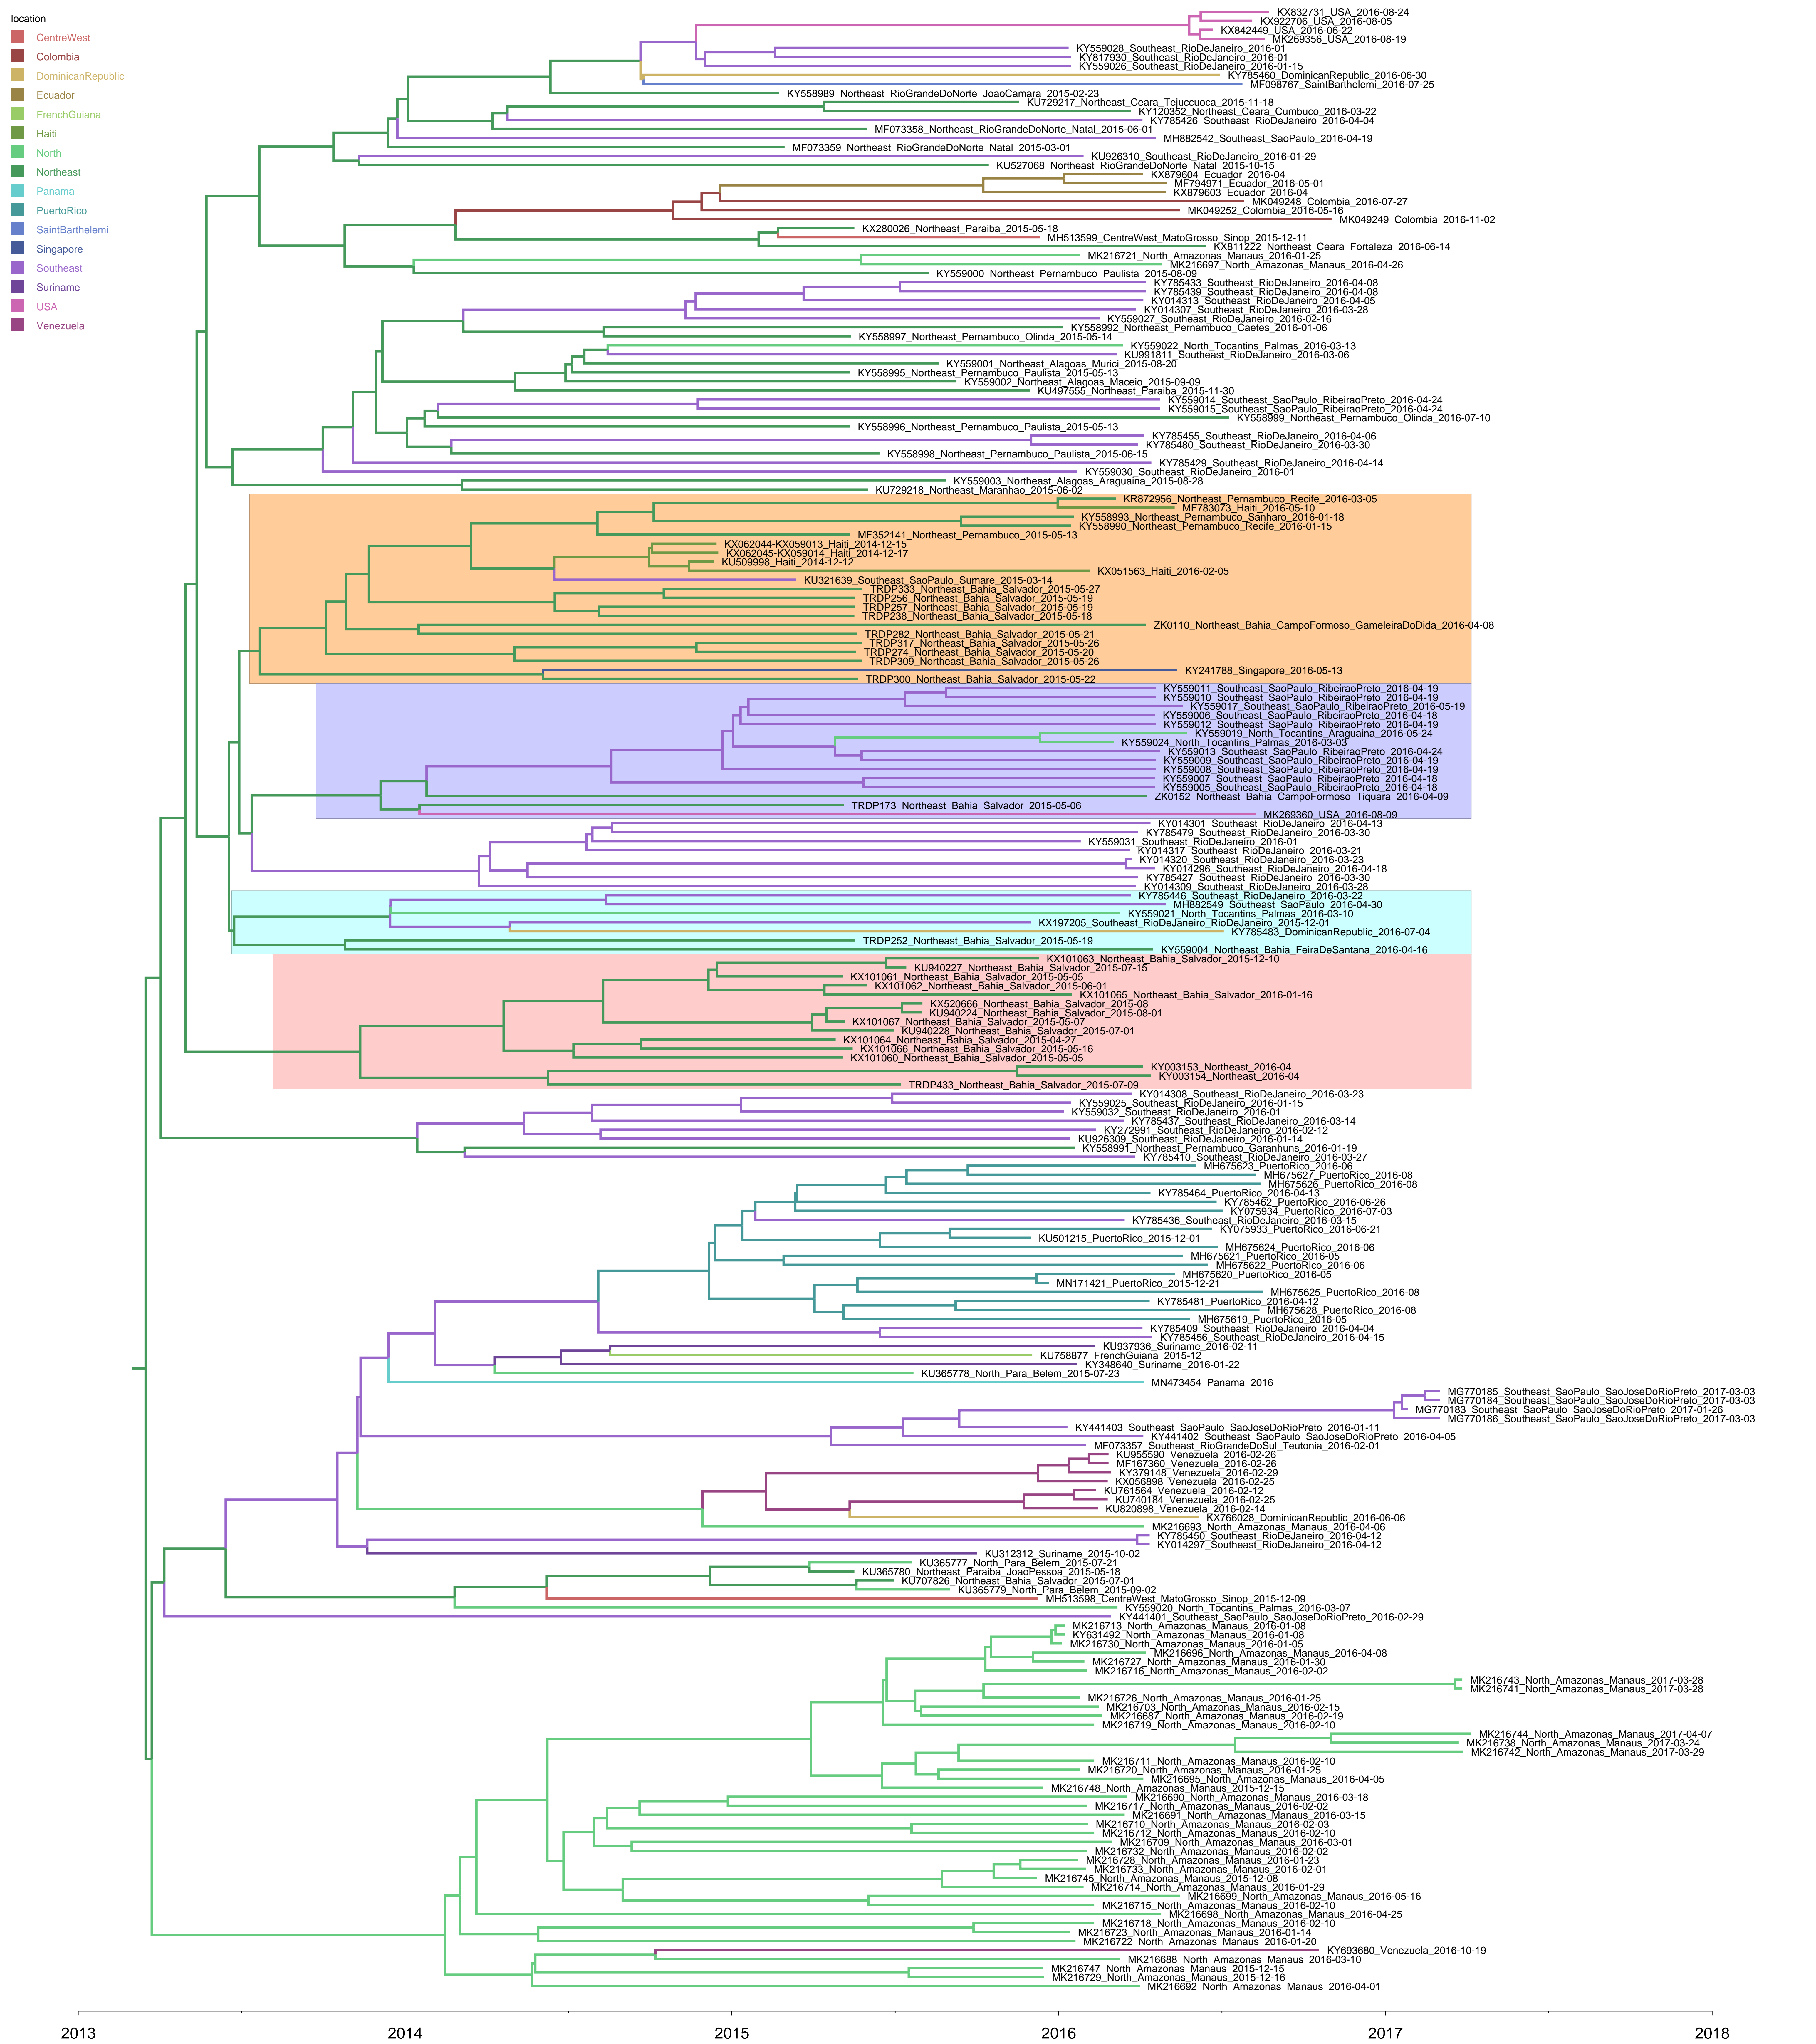

Supplement: s1 [file s1]
